# Supplementary material for: Strain Variation in the Transcriptome of the Dengue Fever Vector, Aedes aegypti
Source: PubMed Central journal article supplement (PMC3276191; doi:10.1534/g3.111.001107), 2012-01-01
Supplement: supp_2.1.103_TableS6.pdf [file supp_2.1.103_TableS6.pdf]

**Table S6 Average fold changes of a random selection of thirteen genes in sugar- (S) and blood-fed (B) *Ae. aegypti* mosquitoes of three different strains as detected by qPCR.**

| transcript-ID | Function descriptors                   | CTM                |                     |                      |                         |
|---------------|----------------------------------------|--------------------|---------------------|----------------------|-------------------------|
|               |                                        | B (std)            | S (std)             | average fold changes | t test                  |
| AAEL006138-RA | Vitellogenin-A1                        | 1.57 (0.93)        | 1.4E-3 (3.21E-4)    | 10.1                 | t=3.29 (df=11) p=0.007  |
| AAEL013284-RA | Serine-type endopeptidase AaLT         | 0.44 (0.16)        | 2.02 E-3 (1.08E-3)  | 7.75                 | t=5.44 (df=9) p<0.001   |
| AAEL013707-RA | Trypsin-1                              | 0.59 (0.52)        | 7.11E-3 (8.26 E-3)  | 6.39                 | t=2.58 (df=10) p=0.027  |
| AAEL001806-RA | Lipid binding                          | 0.21 (0.12)        | 2.84E-2 (2.40 E-3)  | 2.88                 | t=2.93 (df=7) p=0.022   |
| AAEL014734-RA | Catalytic activity                     | 0.16 (7.96 E-2)    | 1.80 E-2 (9.00 E-3) | 3.19                 | t=3.60 (df=7) p=0.009   |
| AAEL011470-RA | Protein binding                        | 6.34E-2 (2.93 E-2) | 4.72E-2 (1.82E-2)   | 0.42                 | t=1.23 (df=7) p=0.340   |
| AAEL013005-RA | Molecular function                     | 1.69E-2 (5.43E-3)  | 1.42E-2 (4E-3)      | 0.42                 | t=0.81 (df=6) p=0.451   |
| AAEL002565-RA | Structural constituent of Cytoskeleton | 7.38E-2(4.70E-2)   | 0.15(0.10)          | -1.03                | t=-1.82 (df=11) p=0.096 |
| AAEL008848-RA | Catalytic activity                     | 0.39 (0.24)        | 0.55 (0.33)         | -0.51                | t=-1.02 (df=11) p=0.328 |
| AAEL012175-RA | Catalytic activity                     | 0.59 (0.58)        | 1.16 (0.83)         | -0.98                | t=-1.52 (df=12) p=0.153 |
| AAEL011871-RA | Electron Transporter                   | 7.6E-2 (0.11)      | 9.25E-2 (9.17E-2)   | 6.6                  | t=-0.27 (df=9) p=0.792  |
| AAEL006425-RA | Trypsin                                | 8.25E-2 (8.18 E-2) | 0.83 (0.15)         | -3.33                | t=-9.59 (df=8) p<0.001  |
| AAEL008701-RA | Iron Ion Binding                       | 1.07E-3 (5.10E-4)  | 1.90E-2 (6.91E-3)   | -4.15                | t=-6.39(df=9) p<0.001   |

|               |                                        | Rex-D               |                     |                      |                        |
|---------------|----------------------------------------|---------------------|---------------------|----------------------|------------------------|
| transcript-ID | Function descriptors                   | B (std)             | S (std)             | average fold changes | t test                 |
| AAEL006138-RA | Vitellogenin-A1                        | 2.69 (0.91)         | 2E-2 (2.95E-2)      | 7.05                 | t=6.53 (df=8) p<0.001  |
| AAEL013284-RA | Serine-type endopeptidase AaLT         | 1.25 (0.36)         | 2.38E-2 (5.55 E-2)  | 5.71                 | t=8.30 (df=9) p<0.001  |
| AAEL013707-RA | Trypsin-1                              | 0.41 (7.50E-2)      | 1.49 E-2 (9.75 E-3) | 4.78                 | t=10.45 (df=6) p<0.001 |
| AAEL001806-RA | Lipid binding                          | 0.17 (0.04)         | 2.63E-2 (7.23 E-3)  | 2.65                 | t=7.08 (df=7) p<0.001  |
| AAEL014734-RA | Catalytic activity                     | 3.88 E-2 (2.96 E-2) | 4.75 E-3 (3.73 E-3) | 3.03                 | t=2.87 (df=8) p=0.021  |
| AAEL011470-RA | Protein binding                        | 2.09 (2.34E-2)      | 2.13 (0.16)         | -0.03                | t=-0.60 (df=9) p=0.566 |
| AAEL013005-RA | Molecular function                     | 1.80E-2 (4.29E-3)   | 7.11E-3(2.26E-4)    | 1.34                 | t=5.08 (df=6) p=0.002  |
| AAEL002565-RA | Structural constituent of Cytoskeleton | 6.75E-2(1.11E-2)    | 7.32E-2(2.88E-2)    | -0.12                | t=-0.37 (df=6) p=0.724 |
| AAEL008848-RA | Catalytic activity                     | 0.21 (0.02)         | 0.28(1.54)          | 0.62                 | t=0.71 (df=8) p=0.503  |
| AAEL012175-RA | Catalytic activity                     | 0.37 (0.25)         | 0.77 (0.38)         | -3.34                | t=-2.01 (df=9) p=0.076 |
| AAEL011871-RA | Electron Transporter                   | 0.45 (0.13)         | 0.69 (0.44)         | -0.62                | t=-1.19(df=9) p=0.266  |
| AAEL006425-RA | Trypsin                                | 2.84E-2 (4.00E-2)   | 0.39 (0.17)         | -3.78                | t=-4.53(df=8) p=0.002  |
| AAEL008701-RA | Iron Ion Binding                       | 1.89E-3 (2.11E-3)   | 1.91E-2 (5.99E-3)   | -3.34                | t=-4.22(df=6) p=0.006  |

Results for LTV are as previously reported (Bonizzoni *et al.*, 2011).
