# Supplementary material for: Strain Variation in the Transcriptome of the Dengue Fever Vector, Aedes aegypti
Source: PubMed Central journal article supplement (PMC3276191; doi:10.1534/g3.111.001107), 2012-01-01
Supplement: supp_2.1.103_TableS12.pdf [file supp_2.1.103_TableS12.pdf]

**Table S12 Enrichment of immunity-related classes of transcripts.** P value associated with a hypergeometric test are shown for mosquitoes of the LVP, CTM and Rex-D strains. p values <0.01 are bold, p values <0.05 are in italicus.

| Immunity-related classes             | LVP                | CTM             | Rex-D           |
|--------------------------------------|--------------------|-----------------|-----------------|
| 1,3-BETA-d Glucan Binding Proteins   | 0.421205879        | 0.093204        | 0.068521        |
| Anti-microbial peptides              | 0.575258861        | 0.054398        | 0.133909        |
| Autophagy Genes                      | <i>0.025244527</i> | <i>0.032705</i> | 0.10294         |
| Caspase Activator                    | 1                  | 0.636229        | 1               |
| Caspases                             | 0.596803387        | <i>0.01438</i>  | 0.967236        |
| Catalase                             | 0.10875457         | 0.157481        | 0.434227        |
| CLIP-domain serine protease          | 0.665377639        | 0.624128        | 0.068302        |
| C-Type Lectins                       | 0.939621148        | 0.961407        | 0.773125        |
| Fibrinogen related protein (FREP)    | 0.729579204        | 0.963194        | 0.325004        |
| Galectins                            | 0.596803387        | 0.767986        | 0.34444         |
| IMD Pathway members                  | 0.799110015        | 0.678041        | 0.627499        |
| inhibitors of apoptosis (IAP)        | <i>0.040252257</i> | 0.259983        | <i>0.047204</i> |
| JAKSTAT Signal transduction          | 0.698987823        | 0.062487        | 0.153783        |
| lysozyme                             | 0.421205879        | 0.573253        | 0.239038        |
| MD2-like proteins (ML)               | 0.976981595        | 0.730233        | 0.561666        |
| others                               | <i>0.016960761</i> | 0.039506        | 0.165959        |
| peptidoglycan recognition protein    | 0.139416573        | 0.095835        | 0.161615        |
| Peroxidase                           | <i>0.01692638</i>  | <i>0.011764</i> | <b>0.000254</b> |
| prophenoloxidase                     | 0.979316144        | 0.971402        | 0.758062        |
| Relish-like proteins                 | 0.254545294        | 0.347469        | 0.153783        |
| Scavenger Receptors                  | 0.086148092        | <b>0.000283</b> | <b>0.000854</b> |
| Serine protease inhibitors           | 0.552011966        | 0.090862        | 0.100341        |
| Small Regulatory RNA pathway members | <b>0.000923729</b> | <i>0.011925</i> | <i>0.033746</i> |
| spaetzle like (SPZ like)             | 0.851962443        | 0.095835        | 0.694443        |
| Superoxido-dismutase                 | 0.523084665        | 0.678041        | 0.110766        |
| Thio-Ester containing proteins (TEP) | 0.167866594        | 0.837272        | 0.239038        |
| Toll Receptors/Pathway               | 0.22889149         | 0.46441         | 0.24858         |
